# Supplementary material for: Cryo-EM structures of Candida albicans Cdr1 reveal azole-substrate recognition and inhibitor blocking mechanisms
Source: PubMed Central journal article supplement — Nat Commun. 2024 Sep 6;15:7722. doi: 10.1038/s41467-024-52107-w (PMC11379888; doi:10.1038/s41467-024-52107-w), 2024-09-06
Supplement: 41467_2024_52107_MOESM3_ESM.pdf [file 41467_2024_52107_MOESM3_ESM.pdf]

## Description of Additional Supplementary Files

**File name: Supplementary Data 1**

Description: Information for primers in this work.
